# Supplementary material for: Integrative analysis of long extracellular RNAs reveals a detection panel of noncoding RNAs for liver cancer
Source: PubMed Central journal article supplement (PMC7681086; doi:10.7150/thno.48206), 2021-01-01
Supplement: thnov11p0181s1.pdf [file thnov11p0181s1.pdf]

## Supplementary Information

**Integrative analysis of long extracellular RNAs reveals a detection panel of structured and circular RNAs for liver cancer**

|                                                                                                                                                                                          |    |
|------------------------------------------------------------------------------------------------------------------------------------------------------------------------------------------|----|
| <b>Supplementary Tables</b>                                                                                                                                                              | 2  |
| <b>Table S1   Clinical characteristic of study participants</b>                                                                                                                          | 2  |
| <b>Table S2   Gene primer sequences used in RT-qPCR for long RNAs</b>                                                                                                                    | 3  |
| <b>Supplementary Figures</b>                                                                                                                                                             | 4  |
| <b>Figure S1   Overview of integrative analysis and experimental design in liver cancer.</b>                                                                                             | 4  |
| <b>Figure S2   Characteristics of cell-free RNA-seq and exosomal RNA-seq.</b>                                                                                                            | 5  |
| <b>Figure S3   Alternative polyadenylation and differential editing events in liver cancer.</b>                                                                                          | 6  |
| <b>Figure S4   RT-qPCR validation of differential expression and alternative splicing RNAs in the same 26 samples as used in the cfRNA-seq dataset.</b>                                  | 7  |
| <b>Figure S5   Machine learning model performances on the 10 candidates in exoRNA-seq and cfRNA data</b>                                                                                 | 8  |
| <b>Figure S6   Comparison of using External RNA Controls Consortium (ERCC) RNA control and glyceraldehyde-3-phosphate dehydrogenase (GAPDH) as reference genes for RT-qPCR analysis.</b> | 9  |
| <b>Figure S7   <i>miR-122</i> expression level for the diagnosis of AFP-negative liver cancer</b>                                                                                        | 10 |

## Supplementary Tables

**Table S1 | Clinical characteristic of study participants**

Clinical characteristic of participants in this study involved in the cfRNA sequencing, RT-qPCR, and exosome enrichment assay, including age, sex, stage, tumor size, vascular invasion, AFP level, and category/tumor site.

**Table1. Clinical characteristic of study participants.**

| <i>cf-RNA Sequencing</i>   |    |     | <i>RT-qPCR</i>             |     |     |                                           |     |     | <i>Exosome Enrichment Assay</i> |     |     |                            |     |     |                            |     |     |
|----------------------------|----|-----|----------------------------|-----|-----|-------------------------------------------|-----|-----|---------------------------------|-----|-----|----------------------------|-----|-----|----------------------------|-----|-----|
| Healthy Donor<br>(n = 30)  |    |     | Liver Cancer<br>(n = 35)   |     |     | Healthy Donor<br>(n = 37)                 |     |     | Liver Cancer<br>(n = 68)        |     |     | Healthy Donor<br>(n = 16)  |     |     | Liver Cancer<br>(n = 16)   |     |     |
| Variable                   | No | %   | Variable                   | No. | %   | Variable                                  | No. | %   | Variable                        | No. | %   | Variable                   | No. | %   | Variable                   | No. | %   |
| <b>Age, years</b>          |    |     | <b>Age, years</b>          |     |     | <b>Age, years</b>                         |     |     | <b>Age, years</b>               |     |     | <b>Age, years</b>          |     |     | <b>Age, years</b>          |     |     |
| Mean                       | 66 |     | Mean                       | 56  |     | Mean                                      | 62  |     | Mean                            | 56  |     | Mean                       | 62  |     | Mean                       | 57  |     |
| SD                         | 7  |     | SD                         | 12  |     | SD                                        | 13  |     | SD                              | 9   |     | SD                         | 9   |     | SD                         | 10  |     |
| <b>Sex</b>                 |    |     | <b>Sex</b>                 |     |     | <b>Sex</b>                                |     |     | <b>Sex</b>                      |     |     | <b>Sex</b>                 |     |     | <b>Sex</b>                 |     |     |
| Male                       | 14 | 47% | Male                       | 29  | 83% | Male                                      | 15  | 41% | Male                            | 61  | 90% | Male                       | 8   | 50% | Male                       | 13  | 81% |
| Female                     | 16 | 53% | Female                     | 6   | 17% | Female                                    | 22  | 59% | Female                          | 7   | 10% | Female                     | 8   | 50% | Female                     | 3   | 19% |
| <b>Stage</b>               |    |     | <b>Stage</b>               |     |     | <b>Chronic hepatitis B *<br/>(n = 24)</b> |     |     | <b>Stage</b>                    |     |     | <b>Stage</b>               |     |     | <b>Stage</b>               |     |     |
|                            |    |     | 0                          | 4   | 11% | Variable                                  | No. | %   | 0                               | 0   | 0   | 0                          | 0   | 0   | 0                          | 0   | 0   |
|                            |    |     | A                          | 26  | 75% |                                           |     |     | A                               | 57  | 84% | A                          | 9   | 56% | A                          | 9   | 56% |
|                            |    |     | B                          | 4   | 11% |                                           |     |     | B                               | 6   | 9%  | B                          | 7   | 44% | B                          | 7   | 44% |
|                            |    |     | C                          | 1   | 3%  |                                           |     |     | C                               | 5   | 7%  | C                          | 0   | 0   | C                          | 0   | 0   |
| <b>Tumor size</b>          |    |     | <b>Tumor size</b>          |     |     | <b>Age, years</b>                         |     |     | <b>Tumor size</b>               |     |     | <b>Tumor size</b>          |     |     | <b>Tumor size</b>          |     |     |
|                            |    |     | ≤ 3 cm                     | 11  | 31% | Mean                                      | 52  |     | ≤ 3 cm                          | 28  | 41% | ≤ 3 cm                     | 4   | 25% | ≤ 3 cm                     | 4   | 25% |
|                            |    |     | > 3 cm                     | 24  | 69% | SD                                        | 11  |     | > 3 cm                          | 40  | 59% | > 3 cm                     | 12  | 75% | > 3 cm                     | 12  | 75% |
| <b>Vascular Invasion</b>   |    |     | <b>Vascular Invasion</b>   |     |     | <b>Sex</b>                                |     |     | <b>Vascular Invasion</b>        |     |     | <b>Vascular Invasion</b>   |     |     | <b>Vascular Invasion</b>   |     |     |
|                            |    |     | Yes                        | 2   | 6%  | Male                                      | 11  | 46% | Yes                             | 3   | 5%  | Yes                        | 1   | 6%  | Yes                        | 1   | 6%  |
|                            |    |     | No                         | 33  | 94% | Female                                    | 13  | 54% | No                              | 64  | 94% | No                         | 15  | 94% | No                         | 15  | 94% |
|                            |    |     | No biopsy                  | 0   | 0   |                                           |     |     | No biopsy                       | 1   | 1%  | No biopsy                  | 0   | 0   | No biopsy                  | 0   | 0   |
| <b>AFP</b>                 |    |     | <b>AFP</b>                 |     |     | <b>AFP</b>                                |     |     | <b>AFP</b>                      |     |     | <b>AFP</b>                 |     |     | <b>AFP</b>                 |     |     |
|                            |    |     | ≤400ng/ml                  | 28  | 80% |                                           |     |     | ≤400ng/ml                       | 58  | 85% | ≤400ng/ml                  | 11  | 80% | ≤400ng/ml                  | 11  | 80% |
|                            |    |     | > 400ng/ml                 | 7   | 20% |                                           |     |     | > 400ng/ml                      | 10  | 15% | > 400ng/ml                 | 5   | 20% | > 400ng/ml                 | 5   | 20% |
| <b>Category/Tumor Site</b> |    |     | <b>Category/Tumor Site</b> |     |     | <b>Category/Tumor Site</b>                |     |     | <b>Category/Tumor Site</b>      |     |     | <b>Category/Tumor Site</b> |     |     | <b>Category/Tumor Site</b> |     |     |
|                            |    |     | HCC                        | 33  | 94% |                                           |     |     | HCC                             | 67  | 99% | HCC                        | 15  | 94% | HCC                        | 15  | 94% |
|                            |    |     | ICC                        | 0   | 0   |                                           |     |     | ICC                             | 0   | 0   | ICC                        | 1   | 6%  | ICC                        | 1   | 6%  |
|                            |    |     | Others                     | 2   | 6%  |                                           |     |     | Others                          | 1   | 1%  | Others                     | 0   | 0   | Others                     | 0   | 0   |

\*: CHB patients were only used in the analysis of Figure 7 and Supplementary Figure 7.

**Table S2 | Gene primer sequences used in RT-qPCR for long RNAs**

| <b>Gene</b>                  | <b>Forward Primer</b>  | <b>Reverse Primer</b>   |
|------------------------------|------------------------|-------------------------|
| <i>UGT2B7</i>                | CAGCAACTGGAAAACAAGCA   | CTTCCACAATTCCCAGAGC     |
| <i>CAMK4</i>                 | GATGGCAACGAGGACATGAAA  | AACTTTCTCTAAGGCTTGCACC  |
| <i>circ-0073052</i>          | TCACCAGCCAACAGCTAAGA   | TTTGTAAGTGTACACTTCTCC   |
| <i>circ-0080695</i>          | TGTGCGCCATAAGGAATTTCAA | ACTCCTCCTGGGTGAAATCCA   |
| <i>HULC</i>                  | ACTCTGAAGTAAAGGCCGGA   | TGCCAGGAAACTTCTTGCTTG   |
| <i>LINC01226</i>             | CCAGAGCTTCACACAAGCTATC | GAAGCCCCCTCCAATGTC      |
| <i>SNORD3B-1</i>             | GAGAAGTTTCTCTGAACGTGTA | AATGGCTGACGGCAGTTG      |
| <i>ADD3</i> (Full length)    | GAACGTAAACAACAAGGCCT   | TACCATGACAGGCACTTCCA    |
| <i>ADD3</i> (Non-ES)         | GCCTAGAAGGATGCTGAGCA   | CAGCTCATGGTTTTCTTCTAAT  |
| <i>ADD3</i> (ES)             | AGGCCTAGAAGGAAAACCATGA | ATCCTTGCCATTTACTACCATG  |
| <i>HNRNPH1</i> (Full length) | GGAAACCTACATCGTTCCTTCT | CAAGATTGAAGTCGAGATGACG  |
| <i>HNRNPH1</i> (Non-ES)      | AAGAAGAGTCCCCCTCCTCATG | AAAGTTATATGGGACACGGGAT  |
| <i>HNRNPH1</i> (ES)          | GAAACATGCCGAATCTCCT    | AAAGTTATATGGGACTCTTCTTG |
| <i>UBE2B1</i> (Full length)  | GACCGCTAGTGAGTATATCGTG | GTCGATTGACACGGTAGAGGA   |
| <i>UBE2B1</i> (Non-ES)       | GACATAGTGACACGTATCCTCG | CACCGACGCCGTACTCCT      |
| <i>UBE2B1</i> (ES)           | AGGAGTACGGCTCATTTTCA   | TTGACACGGTAGAGGATGAGGA  |
| <i>GAPDH</i>                 | GAACGGGAAGCTTGTCATCAA  | ATCGCCCCACTTGATTTTGG    |
| <i>ERCC96</i>                | CAACGGTGCAATCTCAGCTA   | CACGAGGATGTTCTGTTGA     |

## Supplementary Figures

### Figure S1 | Overview of integrative analysis and experimental design in liver cancer.

We used 3 discovery sets (exoRNA-seq data from exoRBase, tissue RNA-seq data from TCGA, and self-profiled cfRNA-seq data) to discover candidate biomarkers, and a validation set (RT-qPCR data) to validate the marker in an independent cohort. Multiple types of RNA regulatory events were assayed on exosomal RNA-seq (exoRNA-seq) data to identify RNA variations. Cell-free RNA-seq (cfRNA-seq) data were profiled to find recurrent RNA variations as candidate biomarkers. TCGA data were collected to confirm these candidate biomarkers at tissue level. RT-qPCR experiment validated these candidate biomarkers in an independent cohort. The patients of liver cancer are in four stages: 0, A, B and C.

(HD: Healthy Donors, HCC: hepatocellular carcinoma, CHB: Chronic hepatitis B, \*: CHB patients' data were only used in the analysis of Figure 7 and Supplementary Figure 7.)

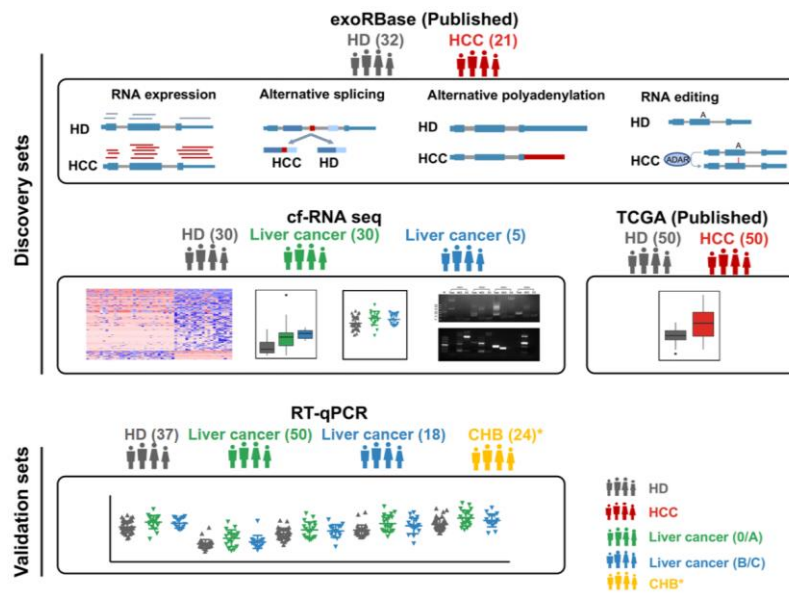

**Figure S2 | Characteristics of cell-free RNA-seq and exosomal RNA-seq.**

(A) Left panel, number of genes identified by cell-free RNA-seq belonging to each RNA species. Right panel, reads distribution of RNA species among all individuals by cell-free RNA-seq.

(B) Left panel, number of genes identified by exosomal RNA-seq belonging to each RNA species. Right panel, reads distribution of RNA species among all individuals by exosomal RNA-seq.

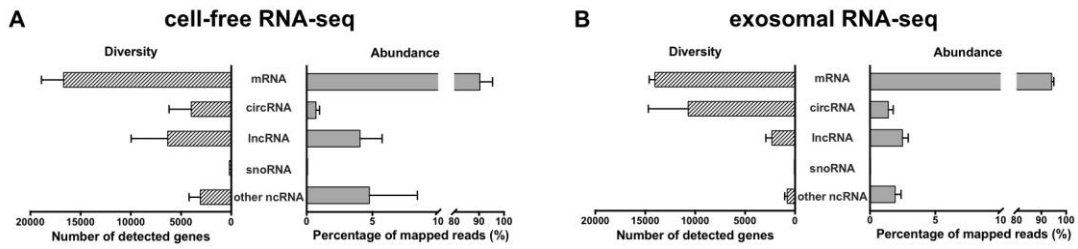

**Figure S3 | Alternative polyadenylation and differential editing events in liver cancer.**

(A) Alternative polyadenylation events between HCC patients and healthy donors identified in exoRNA-seq data.

(B) Differential editing events between HCC patients and healthy donors identified in exoRNA-seq.

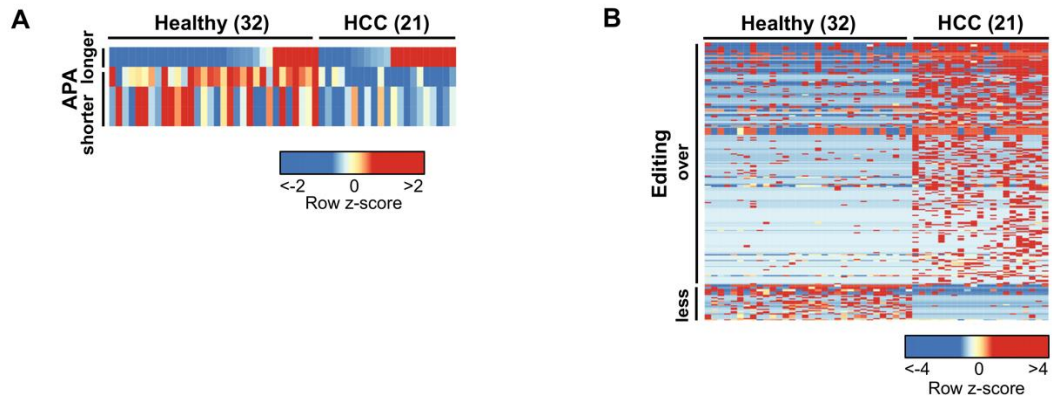

**Figure S4 | RT-qPCR validation of differential expression and alternative splicing RNAs in the same 26 samples as used in the cfRNA-seq dataset.**

- (A) Validation of the seven selected differentially expressed RNA candidates by sequencing data and RT-qPCR results. The RT-qPCR samples are a part of the samples of sequencing data (13 0/A stage liver cancer patients; 13 healthy donors). \*\*\*:  $P$ -value  $< 0.001$ , \*\*:  $P$ -value  $< 0.01$ , \*:  $P$ -value  $< 0.05$ , Wilcoxon rank sum test. (FC: fold-change)
- (B) Validation of the three selected alternatively spliced RNA candidates by sequencing data and RT-qPCR results. The RT-qPCR samples are a part of the samples of sequencing data (13 0/A stage liver cancer patients; 13 healthy donors). \*\*\*:  $P$ -value  $< 0.001$ , \*\*:  $P$ -value  $< 0.01$ , \*:  $P$ -value  $< 0.05$ , Wilcoxon rank sum test. (PSI: percent spliced in index)

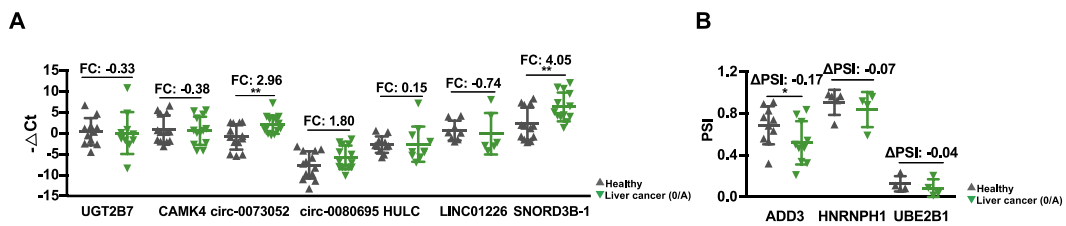

**Figure S5 | Machine learning model performances on the 10 candidates in exoRNA-seq and cfRNA data**

(A) The performance of different classifiers (DT: Decision Tree, SVM: Support Vector Machine, LR: Logistic Regression, RF: Random Forest) on 10 candidates (7 differentially expressed RNAs and 3 alternative splicing events) in exoRNA-seq and cfRNA-seq data. We used 5-fold cross-validation and repeated 10 times by re-shuffling the data.

(B) The left ROC curve represents the RF model trained on cfRNA-seq data and tested on exoRNA-seq data. AUC values of all stages (0, A, B and C) is labeled for exoRNA-seq. (The exoRNA-seq data do not have stage information.) The right ROC curve represents the RF model trained on exoRNA-seq data and tested on cfRNA-seq data. AUC values of all stages (0, A, B and C) and early stages (0 and A) are labeled for cfRNA-seq.

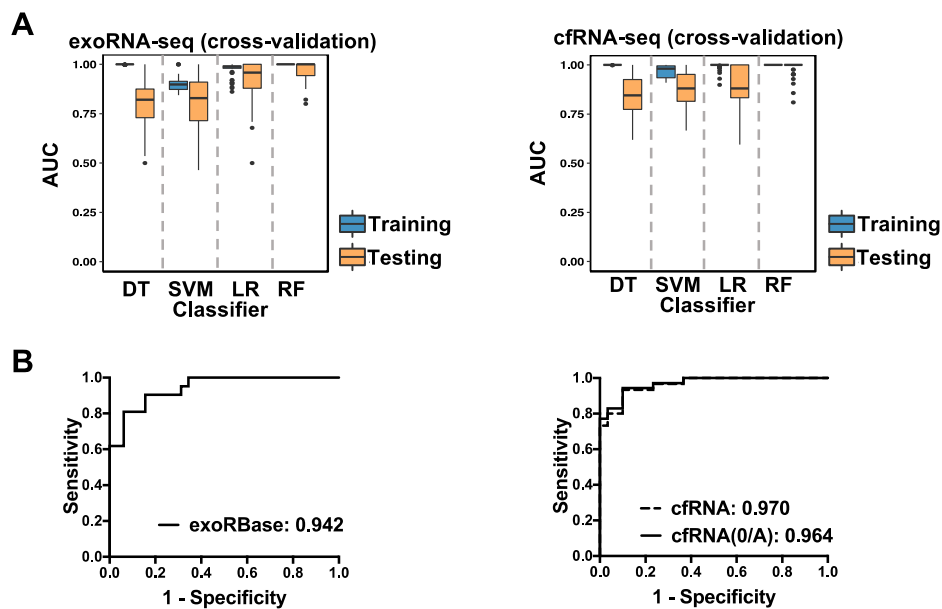



**Figure S6 | Comparison of using External RNA Controls Consortium (ERCC) RNA control and glyceraldehyde-3-phosphate dehydrogenase (GAPDH) as reference genes for RT-qPCR analysis.**

- (A) Fold change values of expression level by RT-qPCR experiment for the selected five genes using ERCC and GAPDH as indicators between liver cancer patients (0/A stage) and healthy donors, liver cancer patients (B/C stage) and healthy donors.
- (B) P-values of Wilcoxon rank sum test of the expression level by RT-qPCR experiment for the selected five genes using ERCC and GAPDH as indicators between liver cancer patients (0/A stage) and healthy donors, liver cancer patients (B/C stage) and healthy donors.

**A**

|       |                    | circ-73052 | circ-80695 | HULC   | LINC01226 | SNORD3B-1 |
|-------|--------------------|------------|------------|--------|-----------|-----------|
| ERCC  | Liver cancer (0/A) | 2.137      | 2.508      | 1.970  | 2.893     | 2.815     |
|       | Liver cancer (B/C) | 1.639      | 0.842      | 1.478  | 1.968     | 1.771     |
| GAPDH | Liver cancer (0/A) | -0.269     | -0.670     | -0.038 | 0.734     | 0.186     |
|       | Liver cancer (B/C) | 0.877      | 0.073      | 1.569  | 1.582     | 1.327     |

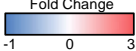
  
 Fold Change  
 -1 0 3

**B**

|       |                    | circ-73052 | circ-80695 | HULC  | LINC01226 | SNORD3B-1 |
|-------|--------------------|------------|------------|-------|-----------|-----------|
| ERCC  | Liver cancer (0/A) | 0.005      | 0.010      | 0.031 | 0.002     | 0.002     |
|       | Liver cancer (B/C) | 0.022      | 0.068      | 0.020 | 0.002     | 0.010     |
| GAPDH | Liver cancer (0/A) | 0.523      | 0.788      | 0.581 | 0.084     | 0.326     |
|       | Liver cancer (B/C) | 0.268      | 1.08E-08   | 0.014 | 1.30E-04  | 0.003     |

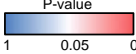
  
 P-value  
 1 0.05 0

### Figure S7 | *miR-122* expression level for the diagnosis of AFP-negative liver cancer

We use *miR-122* as an example to show that individual marker is not as good as the 3-RNA panel. Although *miR-122* was reported as biomarker for hepatic diseases (e.g., CHB: Chronic hepatitis B), the researches on the detection in chronic viral hepatitis have been inconsistent.<sup>1</sup> Thus, a single marker alone is not as good as the combination of 3 RNAs.

$-\Delta\text{Ct}$  values of the *miR-122* expression level by RT-qPCR experiment panel in all samples. The cutoff of  $-\Delta\text{Ct}$  value is  $y = 0.96$ , defined by requiring > 95% specificity in the training set (healthy donors, chronic hepatitis B patients and liver cancer patients). (AFP+: AFP positive (AFP > 400 ng/ml) liver cancer patients, AFP-: AFP negative (AFP < 400 ng/ml) liver cancer patients)

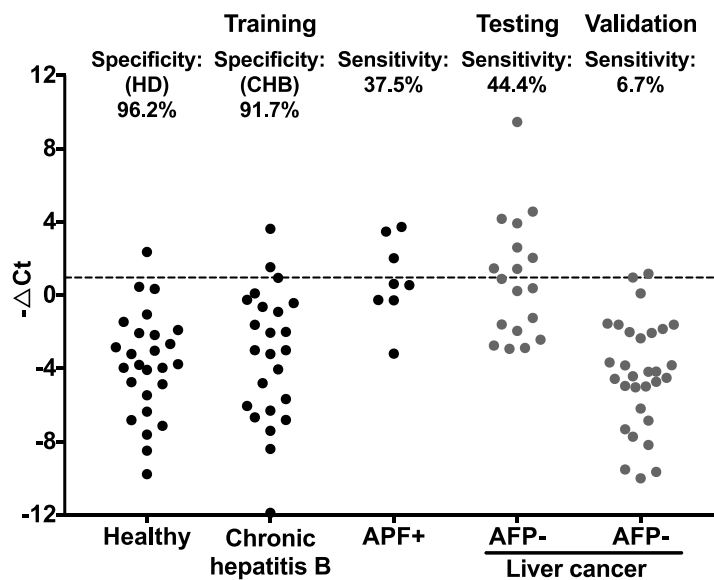

#### Reference

- 1 Zhou, X. *et al.* Diagnostic value of circulating miRNA-122 for hepatitis B virus and/or hepatitis C virus-associated chronic viral hepatitis. *Biosci Rep* **39**, doi:10.1042/BSR20190900 (2019).
